# Supplementary material for: Insight into sulfur-rich selenium sulfide/pyrolyzed polyacrylonitrile cathodes for Li–S batteries
Source: Royal Society of Chemistry journal article supplement (doi:10.1039/d0se00512f), 2020-01-01
Supplement: d0se00512f1.pdf [file d0se00512f1.pdf]

## Supporting Information

### **Insight into Sulfur Rich Selenium Sulfide/Pyrolyzed Polyacrylonitrile Cathodes for Li-S Batteries**

Wei Zhang<sup>a</sup>, Shuping Li<sup>a</sup>, Lihui Wang<sup>a, b</sup>, Xumin Wang<sup>a, b</sup>, Jia Xie<sup>a\*</sup>

<sup>a</sup>State Key Laboratory of Advanced Electromagnetic Engineering and Technology, School of Electrical and Electronic Engineering, Huazhong University of Science and Technology, Wuhan 430074, P. R. China.

<sup>b</sup>State Key Laboratory of Materials Processing and Die & Mould Technology, School of Materials Science and Engineering, Huazhong University of Science and Technology, Wuhan, 430074, China

\*Corresponding Author:

Email: xiejia@hust.edu.cn

**Table S1.** Elemental analysis results of the  $\text{Se}_x\text{S}_{1-x}$ @pPAN composites.

| Materials                                     | C<br>(wt%) | N<br>(wt%) | S<br>(wt%) | Se<br>(wt%) | $\text{Se}_x\text{S}_{1-x}$<br>(wt%) | S Cap.                                             | Se Cap.                                            | $\text{Se}_x\text{S}_{1-x}$ Cap.                   | $\text{Se}_x\text{S}_{1-x}$ Cap.                                     |
|-----------------------------------------------|------------|------------|------------|-------------|--------------------------------------|----------------------------------------------------|----------------------------------------------------|----------------------------------------------------|----------------------------------------------------------------------|
|                                               |            |            |            |             |                                      | (based on<br>composites)<br>(mAh g <sup>-1</sup> ) | (based on<br>composites)<br>(mAh g <sup>-1</sup> ) | (based on<br>composites)<br>(mAh g <sup>-1</sup> ) | (based on<br>$\text{Se}_x\text{S}_{1-x}$ )<br>(mAh g <sup>-1</sup> ) |
| $\text{Se}_{0.35}\text{S}_{0.65}$ @pPAN-350°C | 24.73      | 9.01       | 27.90      | 38.04       | 65.94                                | 467                                                | 258                                                | 725                                                | 1099                                                                 |
| $\text{Se}_{0.38}\text{S}_{0.62}$ @pPAN-450°C | 32.67      | 12.11      | 21.56      | 33.23       | 54.79                                | 361                                                | 225                                                | 586                                                | 1071                                                                 |
| $\text{Se}_{0.44}\text{S}_{0.56}$ @pPAN-550°C | 37.04      | 13.95      | 16.48      | 31.90       | 48.38                                | 276                                                | 216                                                | 492                                                | 1018                                                                 |
| $\text{Se}_{0.48}\text{S}_{0.52}$ @pPAN-650°C | 42.36      | 15.44      | 12.48      | 28.99       | 41.47                                | 209                                                | 197                                                | 406                                                | 978                                                                  |

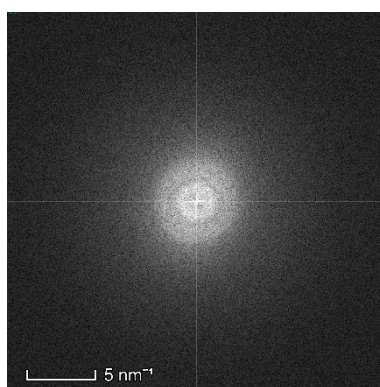**Figure S1.** Selected area electron diffraction pattern of the  $\text{Se}_{0.38}\text{S}_{0.62}$ @pPAN-450 °C.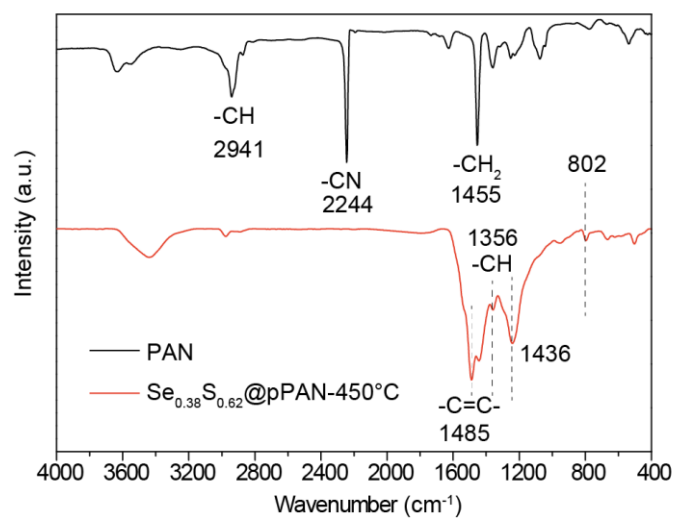**Figure S2.** FT-IR spectra of the PAN and  $\text{Se}_{0.38}\text{S}_{0.62}$ @pPAN-450 °C.

**Table S2.** The ratio of  $I_G/I_D$  in the Raman spectra for the  $Se_xS_{1-x}@pPAN$  composites.

| Materials | $Se_{0.35}S_{0.65}$<br>@pPAN-350°C | $Se_{0.38}S_{0.62}$ @<br>pPAN-450°C | $Se_{0.44}S_{0.56}$ @<br>pPAN-550°C | $Se_{0.48}S_{0.52}$ @<br>pPAN-650°C |
|-----------|------------------------------------|-------------------------------------|-------------------------------------|-------------------------------------|
| $I_G/I_D$ | 0.34                               | 0.46                                | 0.51                                | 0.59                                |

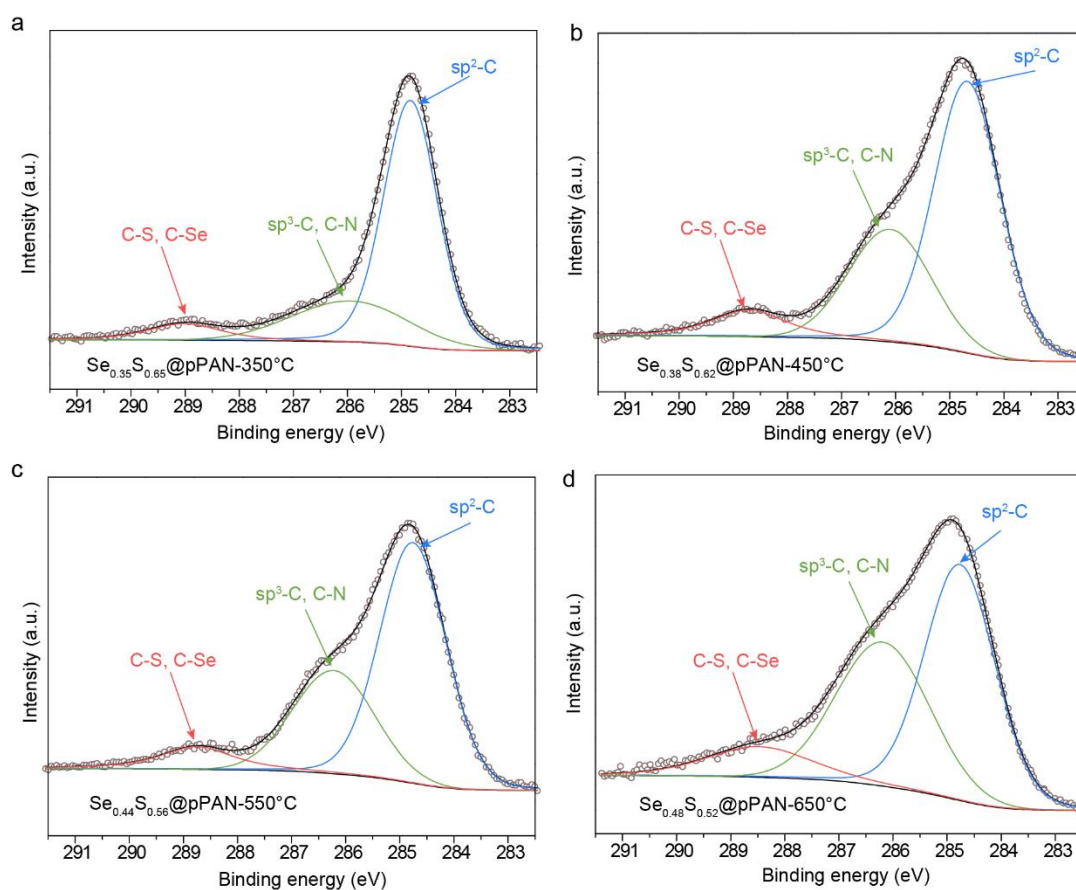

**Figure S3.** XPS spectra of  $Se_xS_{1-x}@pPAN$  composites. C 1s for  $Se_xS_{1-x}@pPAN$ .

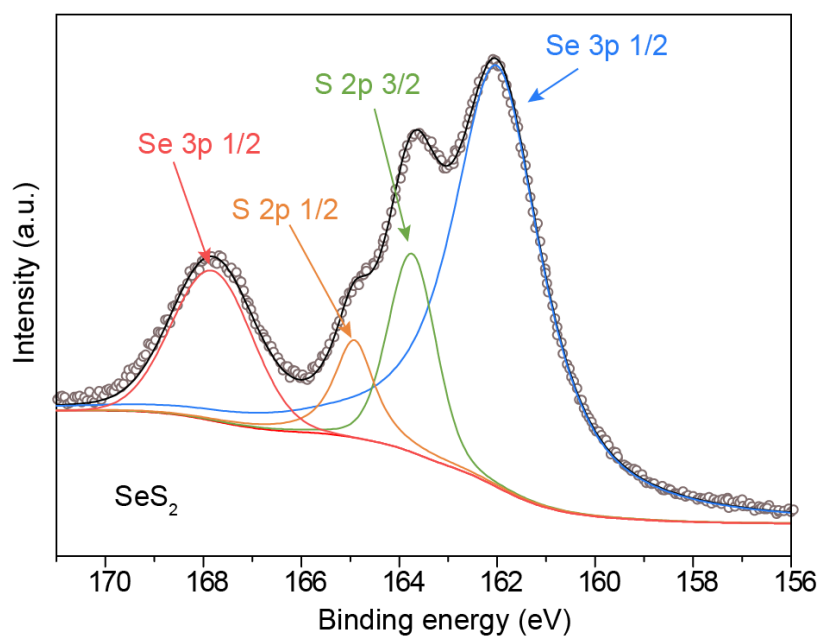

**Figure S4.** XPS spectra of  $\text{SeS}_2$ , S 2p and Se 3p

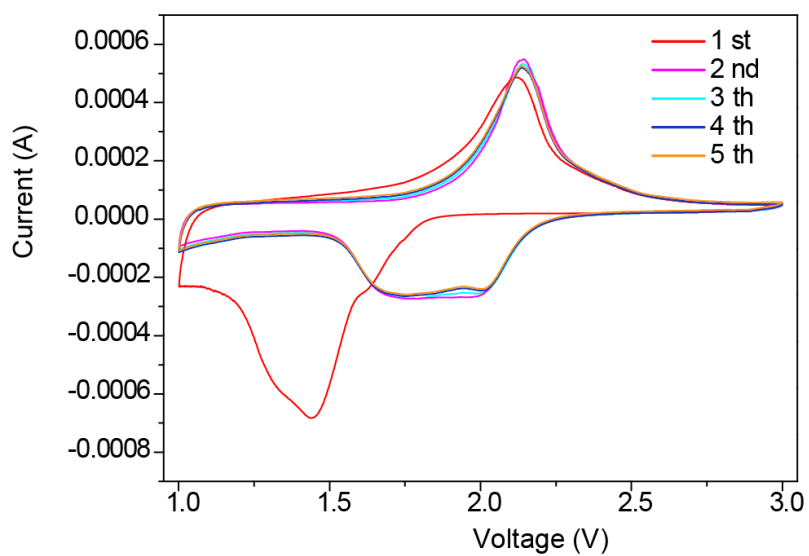

**Figure S5.** Cyclic voltammograms of the  $\text{Se}_{0.38}\text{S}_{0.62}$ @pPAN-450 °C electrode at a scan rate of 0.1 mV/s over a potential window of 1.0-3.0 V (vs.  $\text{Li}^+/\text{Li}$ ) in carbonate electrolyte.

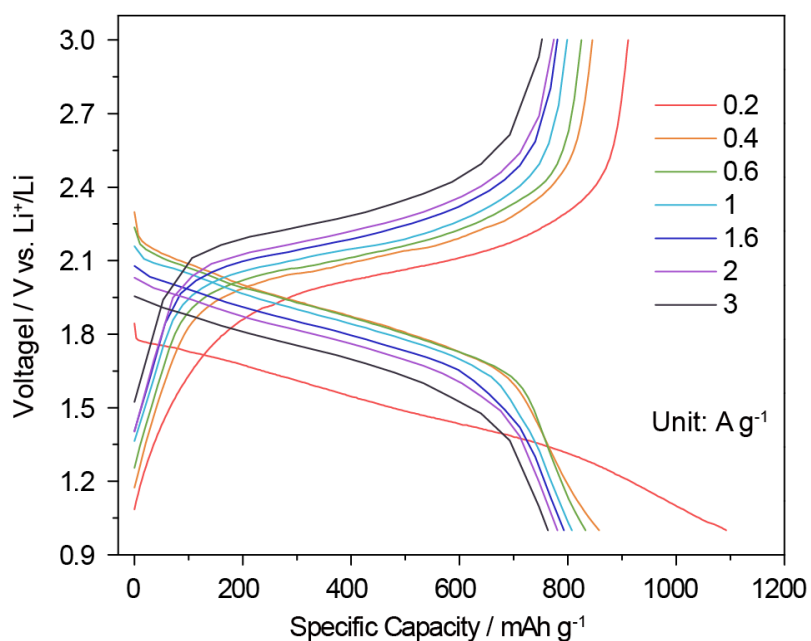

**Figure S6.** The discharge-charge profiles of the  $\text{Se}_{0.38}\text{S}_{0.62}@p\text{PAN}$ -450 °C electrode at various current densities from 1.0 to 3.0 V (vs.  $\text{Li}^+/\text{Li}$ ) in carbonate electrolyte.

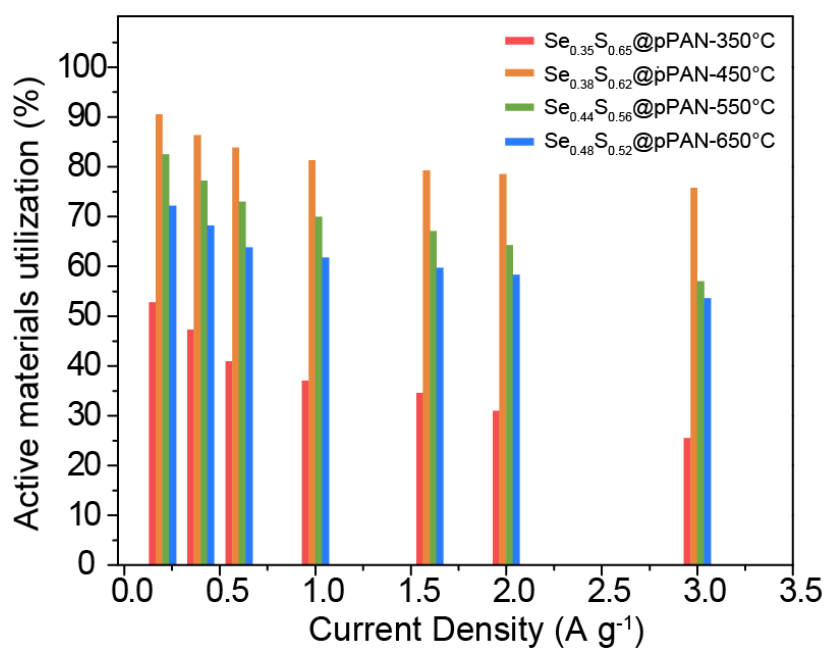

**Figure S7.** The active material utilization of  $\text{Se}_x\text{S}_{1-x}@p\text{PAN}$  electrodes at various current density in carbonate electrolyte.

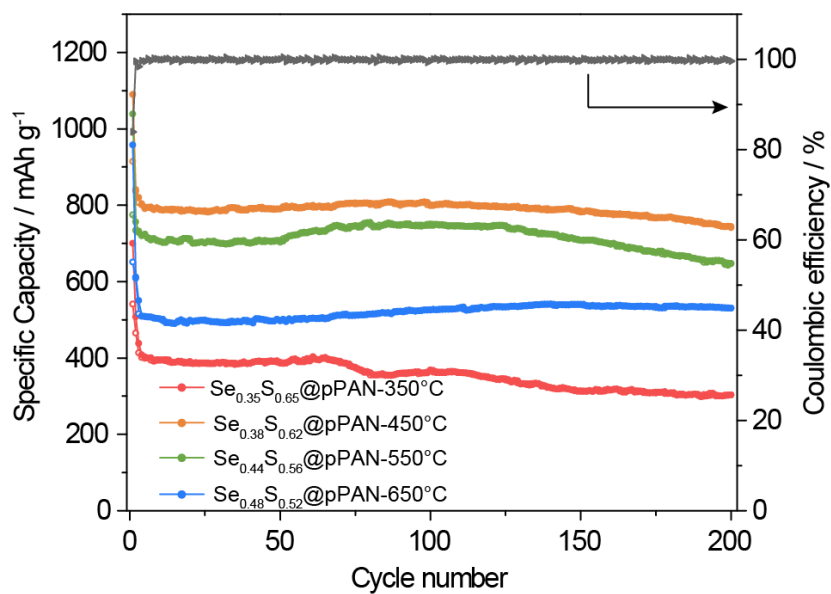

**Figure S8.** Cycling performances of the Se<sub>x</sub>S<sub>1-x</sub>@pPAN electrodes at 1 A g<sup>-1</sup> in ether electrolyte.

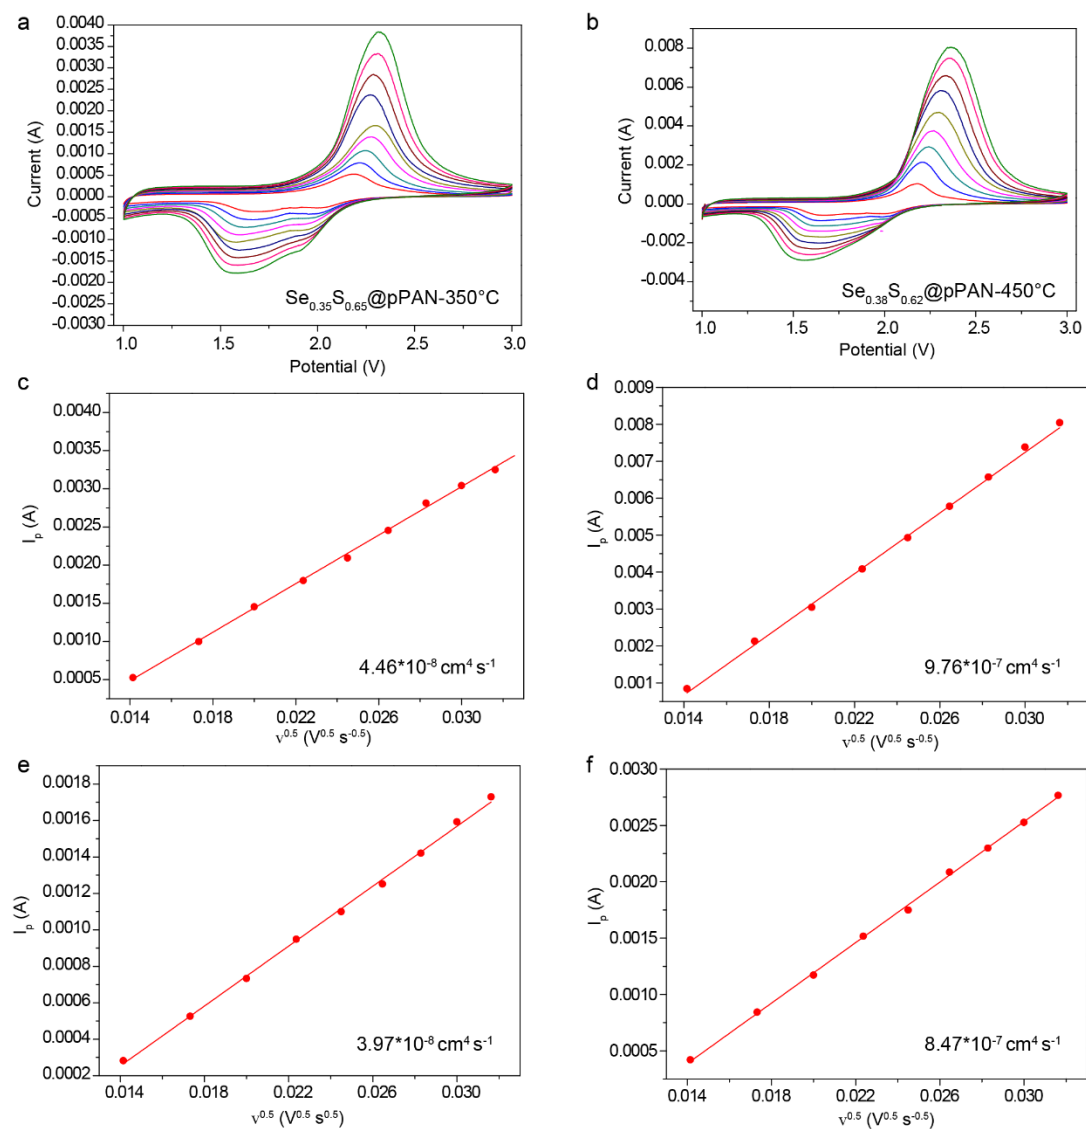

**Figure S9.** CV curves and peak currents versus square root of scan rates of  $\text{Se}_x\text{S}_{1-x}@p\text{PAN}$  electrodes in carbonate electrolyte. (a), (c) and (e) are for  $\text{Se}_{0.35}\text{S}_{0.65}@p\text{PAN}-350^\circ\text{C}$ ; and (b), (d) and (f) are for  $\text{Se}_{0.38}\text{S}_{0.62}@p\text{PAN}-450^\circ\text{C}$ .

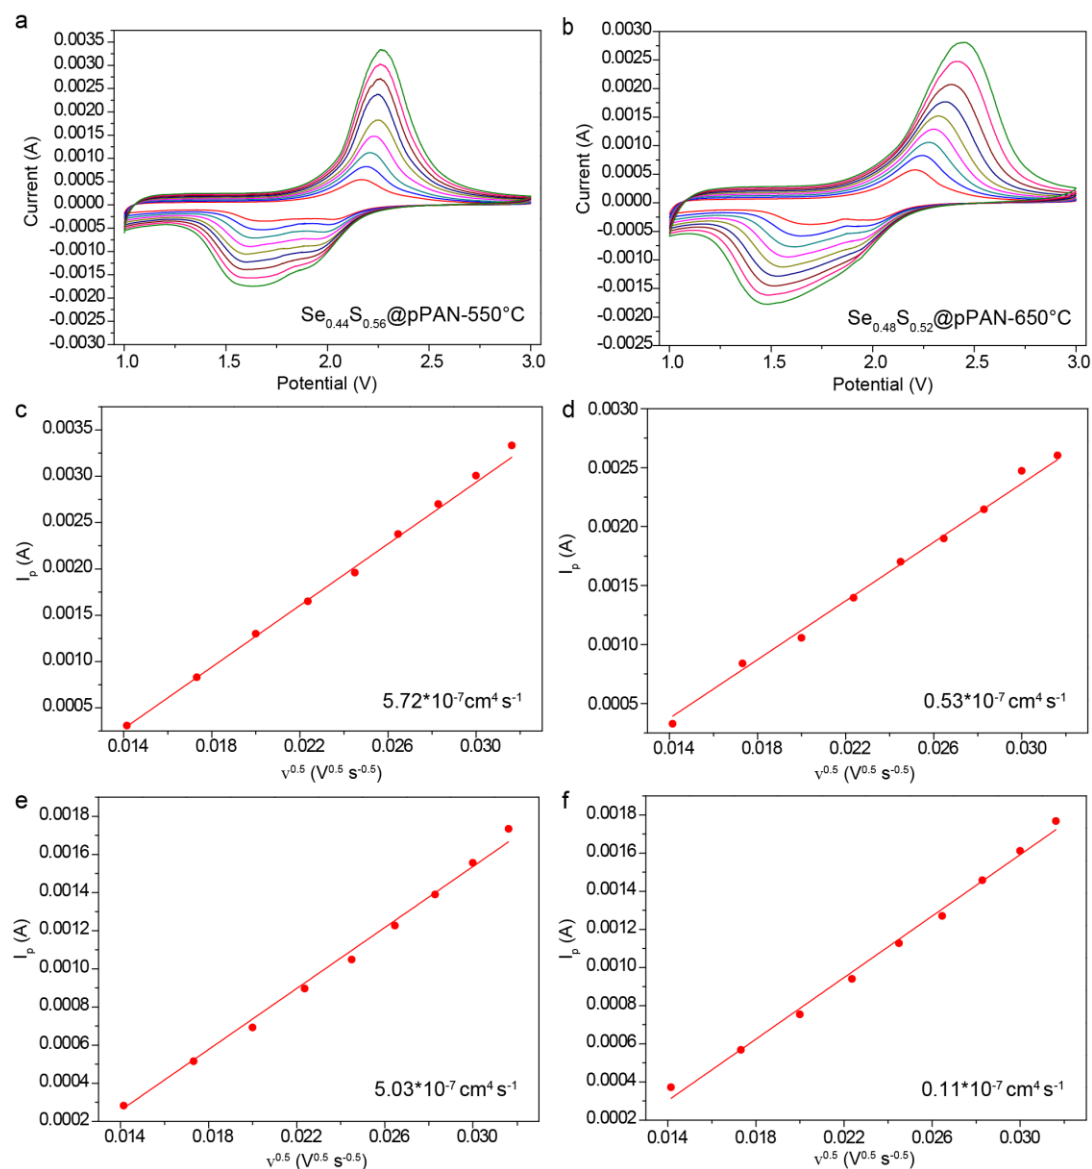

**Figure S10.** CV curves and peak currents versus square root of scan rates of  $\text{SeS}_2@p\text{PAN}$  electrodes in carbonate electrolyte. (a), (c) and (e) are for  $\text{Se}_{0.44}\text{S}_{0.56}@p\text{PAN}-550^\circ\text{C}$ ; and (b), (d) and (f) are for  $\text{Se}_{0.48}\text{S}_{0.52}@p\text{PAN}-650^\circ\text{C}$ .



**Table S3.** Comparison of the results in this work with that of some previously reported cycling performance of S/Se cathodes for Li-S batteries.

| Material                                                                                 | Electrolyte | Current Density<br>(A g <sup>-1</sup> ) | Cycle number | Capacity retention<br>(mAh g <sup>-1</sup> ) | Ref.      |
|------------------------------------------------------------------------------------------|-------------|-----------------------------------------|--------------|----------------------------------------------|-----------|
| Se <sub>x</sub> S <sub>1-x</sub> /pPAN                                                   | Carbonate   | 0.2                                     | 200          | 857.4                                        | This work |
|                                                                                          | Ether       | 0.4                                     | 200          | 806.1                                        |           |
|                                                                                          | Ether       | 1                                       | 500          | 574.5                                        |           |
| Se <sub>x</sub> /cPAN                                                                    | Carbonate   | 0.6                                     | 1200         | 780                                          | 1         |
| pPAN/SeS <sub>2</sub>                                                                    | Carbonate   | 4                                       | 2000         | 633                                          | 2         |
| S <sub>0.87</sub> Se <sub>0.13</sub> /CPAN                                               | Carbonate   | 0.3                                     | 200          | 989                                          | 3         |
| Se <sub>x</sub> S <sub>y</sub> /mesoporous carbon microsphere                            | Ether       | 0.5C                                    | 100          | 796.4                                        | 4         |
| SeS <sub>2</sub> /double-layered hollow carbon sphere                                    | Carbonate   | 1C                                      | 900          | 610                                          | 5         |
| S-rich S <sub>1-x</sub> Se <sub>x</sub> /C                                               | Carbonate   | 1                                       | 500          | 910                                          | 6         |
| Se <sub>2</sub> S <sub>5</sub> confined in micro/mesoporous carbon                       | Ether       | 0.5C                                    | 100          | 430.2                                        | 7         |
| Se <sub>n</sub> S <sub>8-n</sub> Molecules Confined in Nitrogen-Doped Mesoporous Carbons | Ether       | 0.25                                    | 200          | 780                                          | 8         |
| S <sub>22.2</sub> Se/Ketjenblack                                                         | HFE-based   | 1C                                      | 250          | 660                                          | 9         |
| NiCo <sub>2</sub> S <sub>4</sub> @NC-SeS <sub>2</sub>                                    | Ether       | 1C                                      | 800          | 580                                          | 10        |
| CMK-3/SeS <sub>2</sub> @PDA                                                              | Ether       | 2                                       | 500          | 350                                          | 11        |
| CoS <sub>2</sub> @LRC/SeS <sub>2</sub>                                                   | Ether       | 0.5                                     | 400          | 470                                          | 12        |
| S <sub>0.6</sub> Se <sub>0.4</sub> @CNFs                                                 | Carbonate   | 1                                       | 1000         | 346                                          | 13        |
| Co-N-C/SeS <sub>2</sub>                                                                  | Ether       | 0.2C                                    | 200          | 970.2                                        | 14        |
| HMC@TiN/SeS <sub>2</sub>                                                                 | Ether       | 0.2C                                    | 200          | 690                                          | 15        |
| S/Se@CB@NNH                                                                              | Ether       | 0.2                                     | 500          | 915                                          | 16        |

## Reference:

- [1] C. Luo, Y. J. Zhu, Y. Wen, J. J. Wang, C. S. Wang, Carbonized Polyacrylonitrile-Stabilized  $\text{SeS}_x$  Cathodes for Long Cycle Life and High Power Density Lithium Ion Batteries, *Adv. Funct. Mater.* 24 (26) (2014) 4082-4089.
- [2] Z. Li, J. T. Zhang, Y. Lu, X. W. Lou, A pyrolyzed polyacrylonitrile/selenium disulfide composite cathode with remarkable lithium and sodium storage performances, *Sci. Adv.* 4 (6) (2018) 1687.
- [3] T. C. Zhu, Y. Pang, Y. G. Wang, C. X. Wang, Y. Y. Xia,  $\text{S}_{0.87}\text{Se}_{0.13}/\text{CPAN}$  composites as high capacity and stable cycling performance cathode for lithium sulfur battery, *Electrochimica Acta* 281 (2018) 789-795.
- [4] Y. J. Wei, Y. Q. Tao, Z. K. Kong, L. Liu, J. T. Wang, W. N. Qiao, L. C. Ling, D. H. Long, Unique electrochemical behavior of heterocyclic selenium–sulfur cathode materials in ether-based electrolytes for rechargeable lithium batteries, *Energy Storage Materials* 5 (2016) 171-179.
- [5] H. W. Zhang, L. Zhou, X. D. Huang, H. Song, C. Z. Yu, Encapsulation of selenium sulfide in double-layered hollow carbon spheres as advanced electrode material for lithium storage, *Nano Research* 9(12) (2016) 3725-3734.
- [6] X. N. Li, J. W. Liang, K. L. Zhang, Z. G. Hou, W. Q. Zhang, Y. C. Zhu, Y. T. Qian, Amorphous S-rich  $\text{S}_{1-x}\text{Se}_x/\text{C}$  ( $x \leq 0.1$ ) composites promise better lithium-sulfur batteries in a carbonate-based electrolyte, *Energy Environ. Sci.* 8(11) (2015) 3181-3186.

- [7] G. L. Xu, T. Y. Ma, C. J. Sun, C. Lou, L. Cheng, Z. H. Chen, K. Amine, et al. Insight into the capacity fading mechanism of amorphous  $\text{Se}_2\text{S}_5$  confined in micro/mesoporous carbon matrix in ether-based electrolytes, *Nano letters* 16(4) (2016) 2663-2673.
- [8] F. G. Sun, H. Y. Cheng, J. Z. Chen, N. Zheng, Y. S. Li, J. L. Shi, Heteroatomic  $\text{Se}_n\text{S}_{8-n}$  Molecules Confined in Nitrogen-Doped Mesoporous Carbons as Reversible Cathode Materials for High-Performance Lithium Batteries, *ACS Nano* 10(9) (2016) 8289-8298.
- [9] G. L. Xu, H. Sun, C. Luo, L. Estevez, M. Hao, et al. Solid-State Lithium/Selenium-Sulfur Chemistry Enabled via a Robust Solid-Electrolyte Interphase, *Adv. Energy Mater.* 9(2) (2019) 1802235.
- [10] B. S. Guo, T. T. Yang, W. Y. Du, Q. R. Ma, L. Z. Zhang, S. J. Bao, X. Y. Li, Y. M. Chen, M. W. Xu, Double-walled N-doped carbon@ $\text{NiCo}_2\text{S}_4$  hollow capsules as  $\text{SeS}_2$  hosts for advanced Li- $\text{SeS}_2$  batteries, *J. Mater. Chem. A* 7(19) (2019) 12276-12282.
- [11] Z. Li, J. T. Zhang, H. B. Wu, X. W. Lou, An improved Li- $\text{SeS}_2$  battery with high energy density and long cycle life, *Adv. Energy Mater.* 7(15) (2017) 1700281.
- [12] J. T. Zhang, Z. Li, X. W. Lou, A Freestanding Selenium Disulfide Cathode Based on Cobalt Disulfide-Decorated Multichannel Carbon Fibers with Enhanced Lithium Storage Performance, *Angew. Chem. Int. Ed.* 56(45) (2017) 14107-14112.

- [13] Y. Yao, L. C. Zeng, S. H. Hu, Y. Jiang, B. B. Yuan, Y. Yu, Binding  $S_{0.6}Se_{0.4}$  in 1D Carbon Nanofiber with C-S Bonding for High-Performance Flexible Li-S Batteries and Na-S Batteries, *Small* 13(19) (2017) 1603513.
- [14] J. R. He, W. Q. Lv, Y. F. Chen, J. Xiong, K. C. Wen, C. Xu, W. L. Zhang, Y. R. Li, W. Qin, W. D. He, Direct impregnation of  $SeS_2$  into a MOF-derived 3D nanoporous Co-N-C architecture towards superior rechargeable lithium batteries, *J. Mater. Chem. A* 6(22) (2018) 10466-10473.
- [15] Z. Li, J. T. Zhang, B. Y. Guan, X. W. Lou, Mesoporous Carbon@titanium nitride hollow spheres as an efficient  $SeS_2$  host for advanced Li- $SeS_2$  batteries, *Angew. Chem. Int. Ed.* 56(50) (2017) 16003-16007.
- [16] T. Meng, Y. N. Liu, L. P. Li, J. H. Zhu, J. C. Gao, H. Zhang, L. Ma, C. M. Li, J. Jiang, Smart Merit Combination of Sulfur, Selenium and Electrode Engineering to Build Better Sustainable Li-Storage Batteries, *ACS Sustainable Chem. Eng.* 7(1) (2018) 802-809.
